# Supplementary material for: DIAPH1-MFN2 interaction regulates mitochondria-SR/ER contact and modulates ischemic/hypoxic stress
Source: Nat Commun. 2023 Oct 30;14:6900. doi: 10.1038/s41467-023-42521-x (PMC10616211; doi:10.1038/s41467-023-42521-x)
Supplement: Supplementary file 1 — Supplementary Information [file 41467_2023_42521_MOESM1_ESM.pdf]

## **Supplementary Information:**

### **DIAPH1-MFN2 interaction regulates mitochondria-SR/ER contact and modulates ischemic/hypoxic stress**

Gautham Yepuri<sup>1</sup>, Lisa M. Ramirez<sup>2</sup>, Gregory G. Theophall<sup>2</sup>, Sergei V Reverdatto<sup>2</sup>, Nosirudeen Quadri<sup>1</sup>, Syed Nurul Hasan, Lei Bu<sup>3</sup>, Devi Thiagarajan, Robin Wilson<sup>1</sup>, Raquel López Díez<sup>1</sup>, Paul F. Gugger<sup>1</sup>, Kaamashri Mangar<sup>1</sup>, Navneet Narula<sup>4</sup>, Stuart D. Katz<sup>3</sup>, Boyan Zhou<sup>5</sup>, Huilin Li<sup>5</sup>, Aleksandr B. Stotland<sup>6</sup>, Roberta A. Gottlieb<sup>7</sup>, Ann Marie Schmidt<sup>1</sup>, Alexander Shekhtman<sup>2#</sup>, Ravichandran Ramasamy<sup>1#\*</sup>

<sup>1</sup>Diabetes Research Program, Division of Endocrinology, Diabetes and Metabolism, Department of Medicine, NYU Grossman School of Medicine, New York, New York 10016

<sup>2</sup>Department of Chemistry, University of Albany, State University of New York, Albany, New York, 12222

<sup>3</sup>Department of Medicine, Leon H. Charney Division of Cardiology, NYU Grossman School of Medicine, New York, New York 10016

<sup>4</sup>Department of Pathology, NYU Grossman School of Medicine, New York, New York 10016

<sup>5</sup>Department of Population Health, NYU Grossman School of Medicine, New York, New York 10016

<sup>6</sup>Department of Cardiology, Smidt Heart Institute, Cedars-Sinai Medical Center, Los Angeles, CA 90048

<sup>7</sup>Department of Biomedical Sciences, Smidt Heart Institute, Cedars-Sinai Medical Center, Los Angeles, CA 90048

\*Corresponding Author, email: ravichandran.ramasamy@nyulangone.org,

# These authors jointly supervised this work

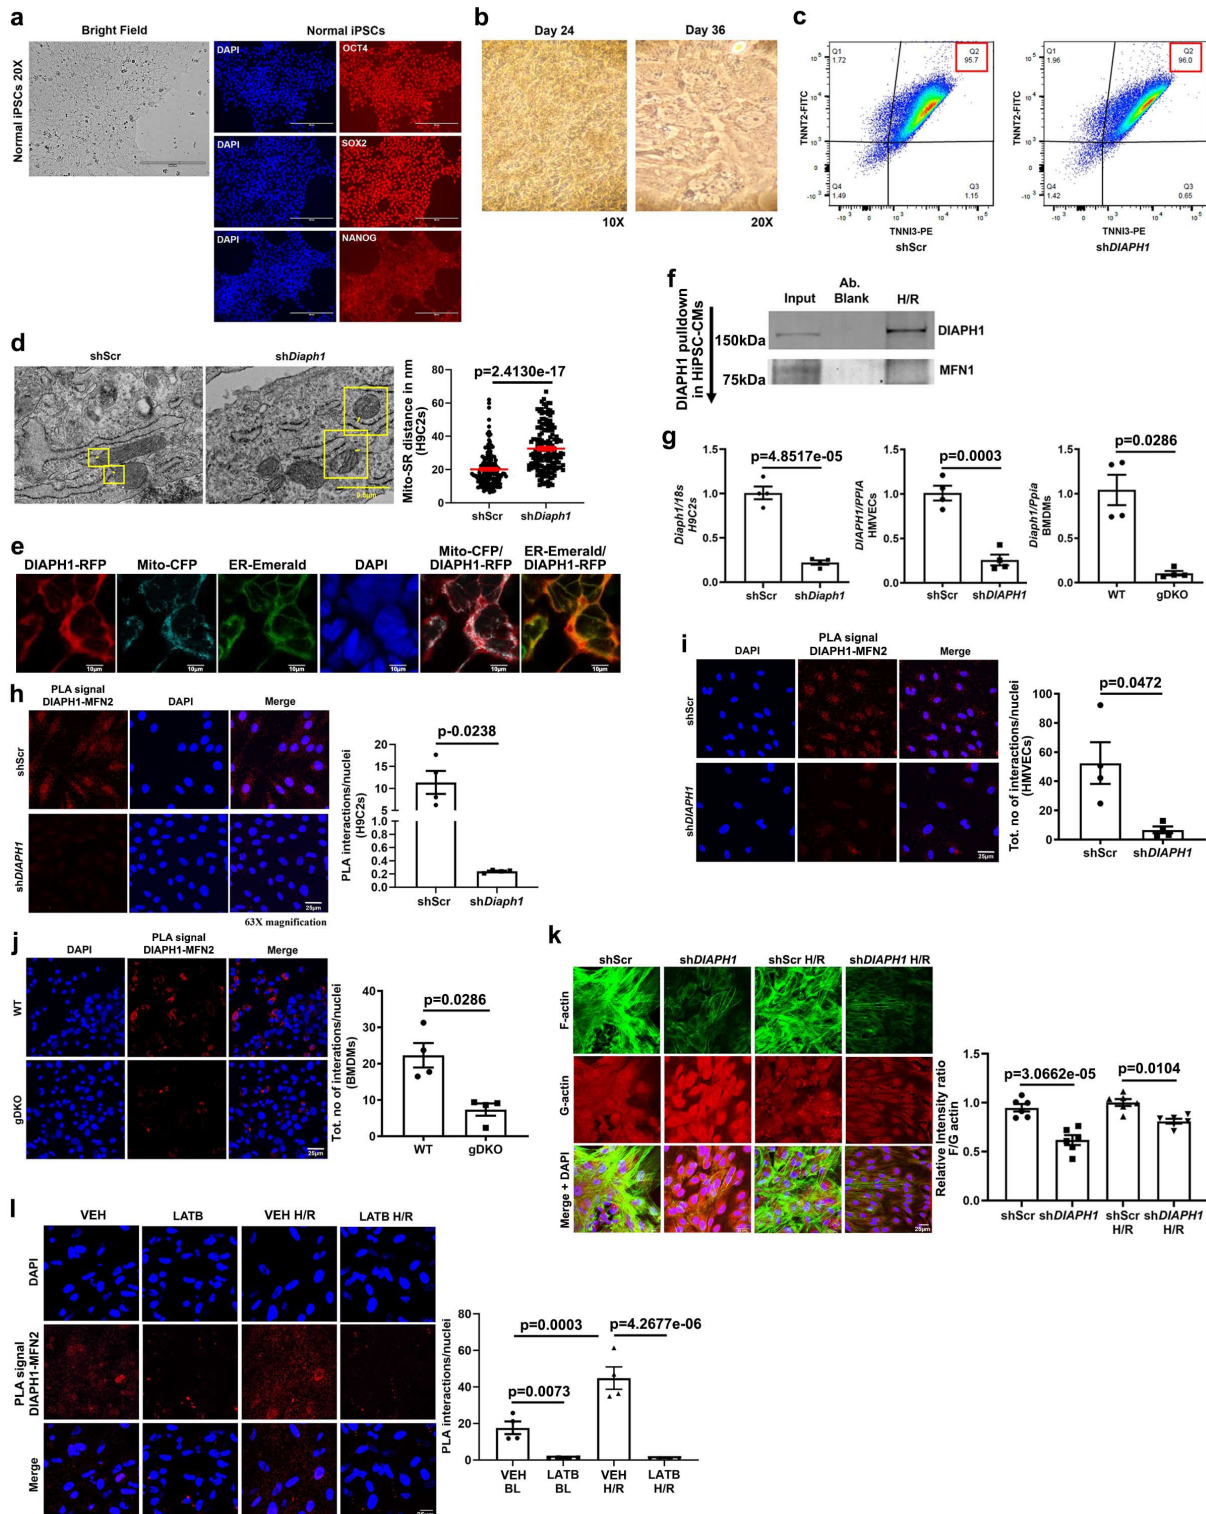

**Supplementary figure 1| Data supporting figure 1: a.** represents bright field image with clean borders of iPSC colony successfully reprogrammed from human adult dermal fibroblasts and IF

staining for positive iPSC markers OCT4/SOX2 and NANOG. Scale bar 200  $\mu\text{m}$ . **b.** Videos represent beating of CMs differentiated from HiPSCs at day 24 using 10x and day 36 using 20x objective with Olympus CK-2 Phase Contrast Microscope. **c.** Flow-cytometry showing double positivity for CM marker cTNT and adult CM marker TNNI3. **d.** TEM images to measure Mito-ER distance in H9C2 cells and respective quantification. Scale bar 0.5  $\mu\text{m}$ . (n=4 biologically independent samples, wilcoxon rank-sum test for p values) **e.** Fluorescent images using Zeiss LSM 710 confocal imaging system of HEK293T expressing Mito marker pECFP-Mito (CFP), DIAPH1-red fluorescent protein, (RFP), and ER marker mEmerald-Calreticulin-N-16 (Emerald), and the overlaid images. Nuclear stained (DAPI stained) HEK293T are shown prior to the overlay images. Scale bar 10  $\mu\text{m}$ . **f.** represents pulldown assay using antibody to DIAPH1 in HiPSCs followed by Western blotting with antibody to MFN1. **g.** qPCR showing *DIAPH1* gene expression normalized either to 18s or *PPIA* in H9C2, HMVECs and BMDMs from WT or global DKO (“gDKO”) mice **h-i-j.** Leica SP8 confocal microscopy images of DUOLINK PLA and respective quantification of signal demonstrating DIAPH1-MFN2 interactions in H9C2 cells (**h**), **i.** HMVECs (**i**) and **j.** BMDMs (**j**). (**g-j**, n=4 biologically independent samples, unpaired t-test (H9C2 and HMVECs) and wilcoxon rank-sum test(BMDMs) was performed for p values). **k.** Leica SP8 confocal microscopy images of Alexa Fluor™ 488 Phalloidin to stain F-actin (green) and Deoxyribonuclease I, Alexa Fluor™ 594 Conjugate to stain G-actin (red) and corresponding quantification of relative intensity of F/G actin. Scale bar 25  $\mu\text{m}$ . (n=6 biologically independent samples, TukeyHSD test was performed for p value). **l.** represents Leica SP8 confocal microscopy images of DUOLINK PLA signal in HiPSC-CMs either treated with VEH (DMSO) or 10  $\mu\text{M}$  Latrunculin-B (LATB) for 1 h before H/R. (n=4 biologically independent samples, Welch’s

ANOVA with t-test pooled SD Test for p value). Data are presented as the mean  $\pm$  SEM. Source data are provided as a Source Data file.

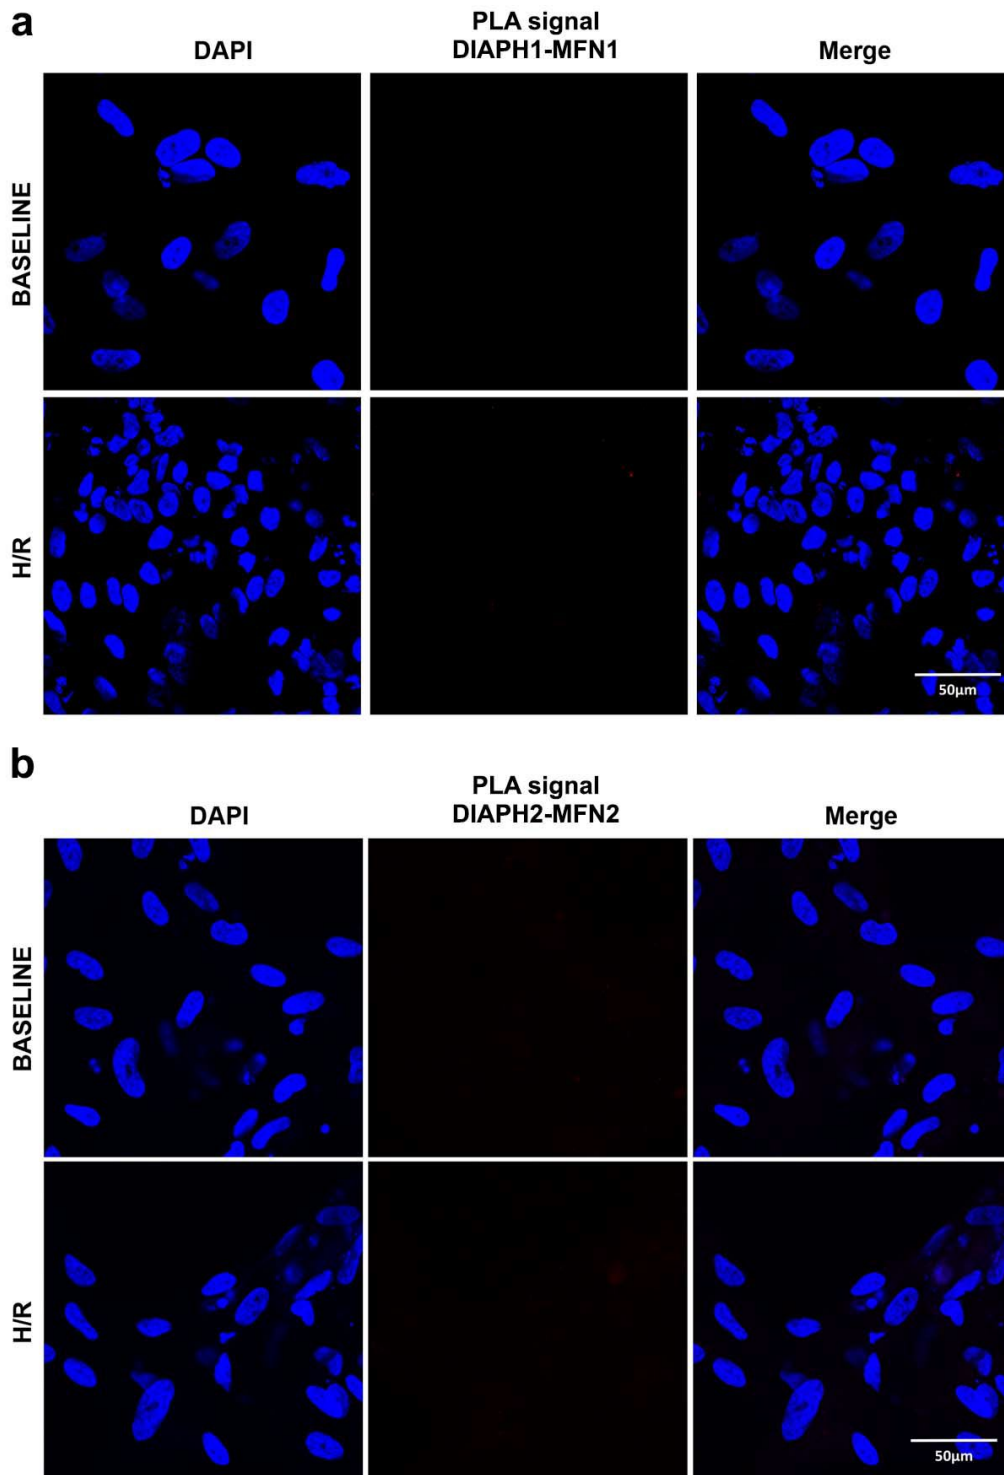

**Supplementary figure 2| Data supporting figure 1: a.** Leica SP8 confocal microscopy images at 63X magnification representing DUOLINK PLA for DIAPH1-MFN2 under both baseline and H/R conditions, and **b.** DIAPH2-MFN2 interactions in HiPSC-CMs under both baseline and H/R

conditions. (n=4 biologically independent samples). Source data are provided as a Source Data file.

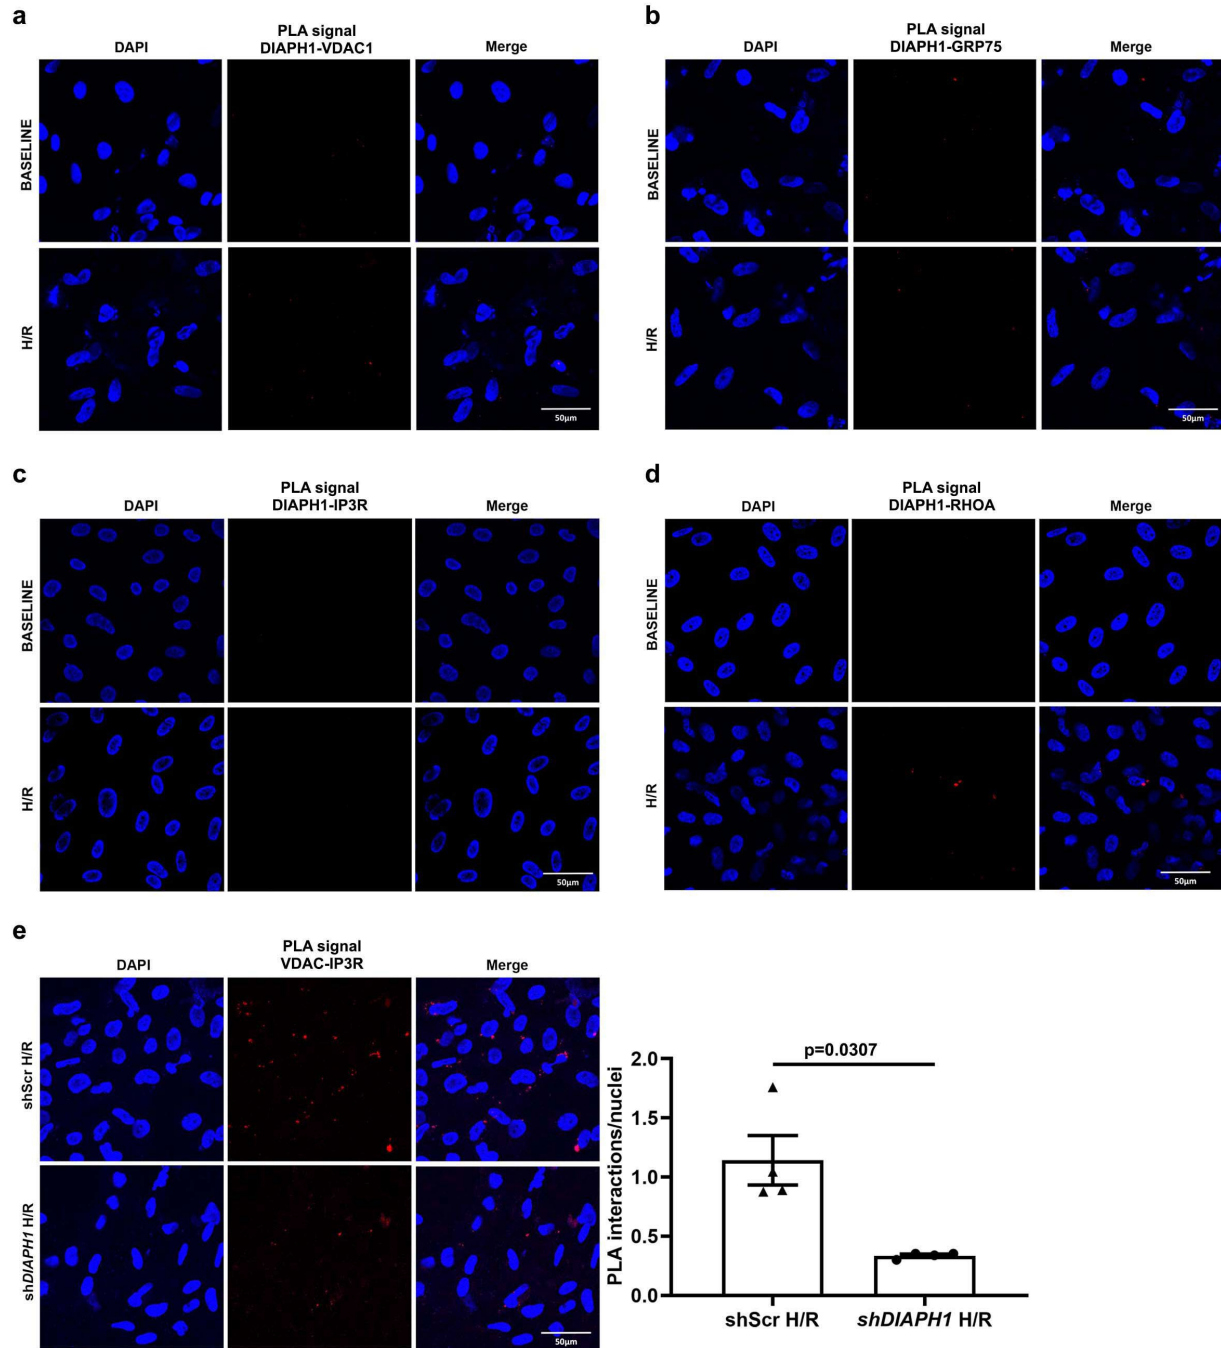

**Supplementary figure 3| Data supporting figure 1:** **a.** Leica SP8 confocal microscopy images at 63X magnification representing DUOLINK PLA for DIAPH1-VDAC1, **b.** DIAPH1-GRP75, **c.** DIAPH1-IP3R and **d.** DIAPH1-RHOA interactions in HiPSC-CMs under baseline and H/R conditions. (**a-d**, n=4 biologically independent samples). **e.** represents DUOLINK PLA VDAC-IP3R interactions along with quantification in shScr and shDIAPH1 HiPSC-CMs under H/R. (n=4

biologically independent samples, unpaired t test was performed for p value). Data are presented as the mean  $\pm$  SEM. Source data are provided as a Source Data file.

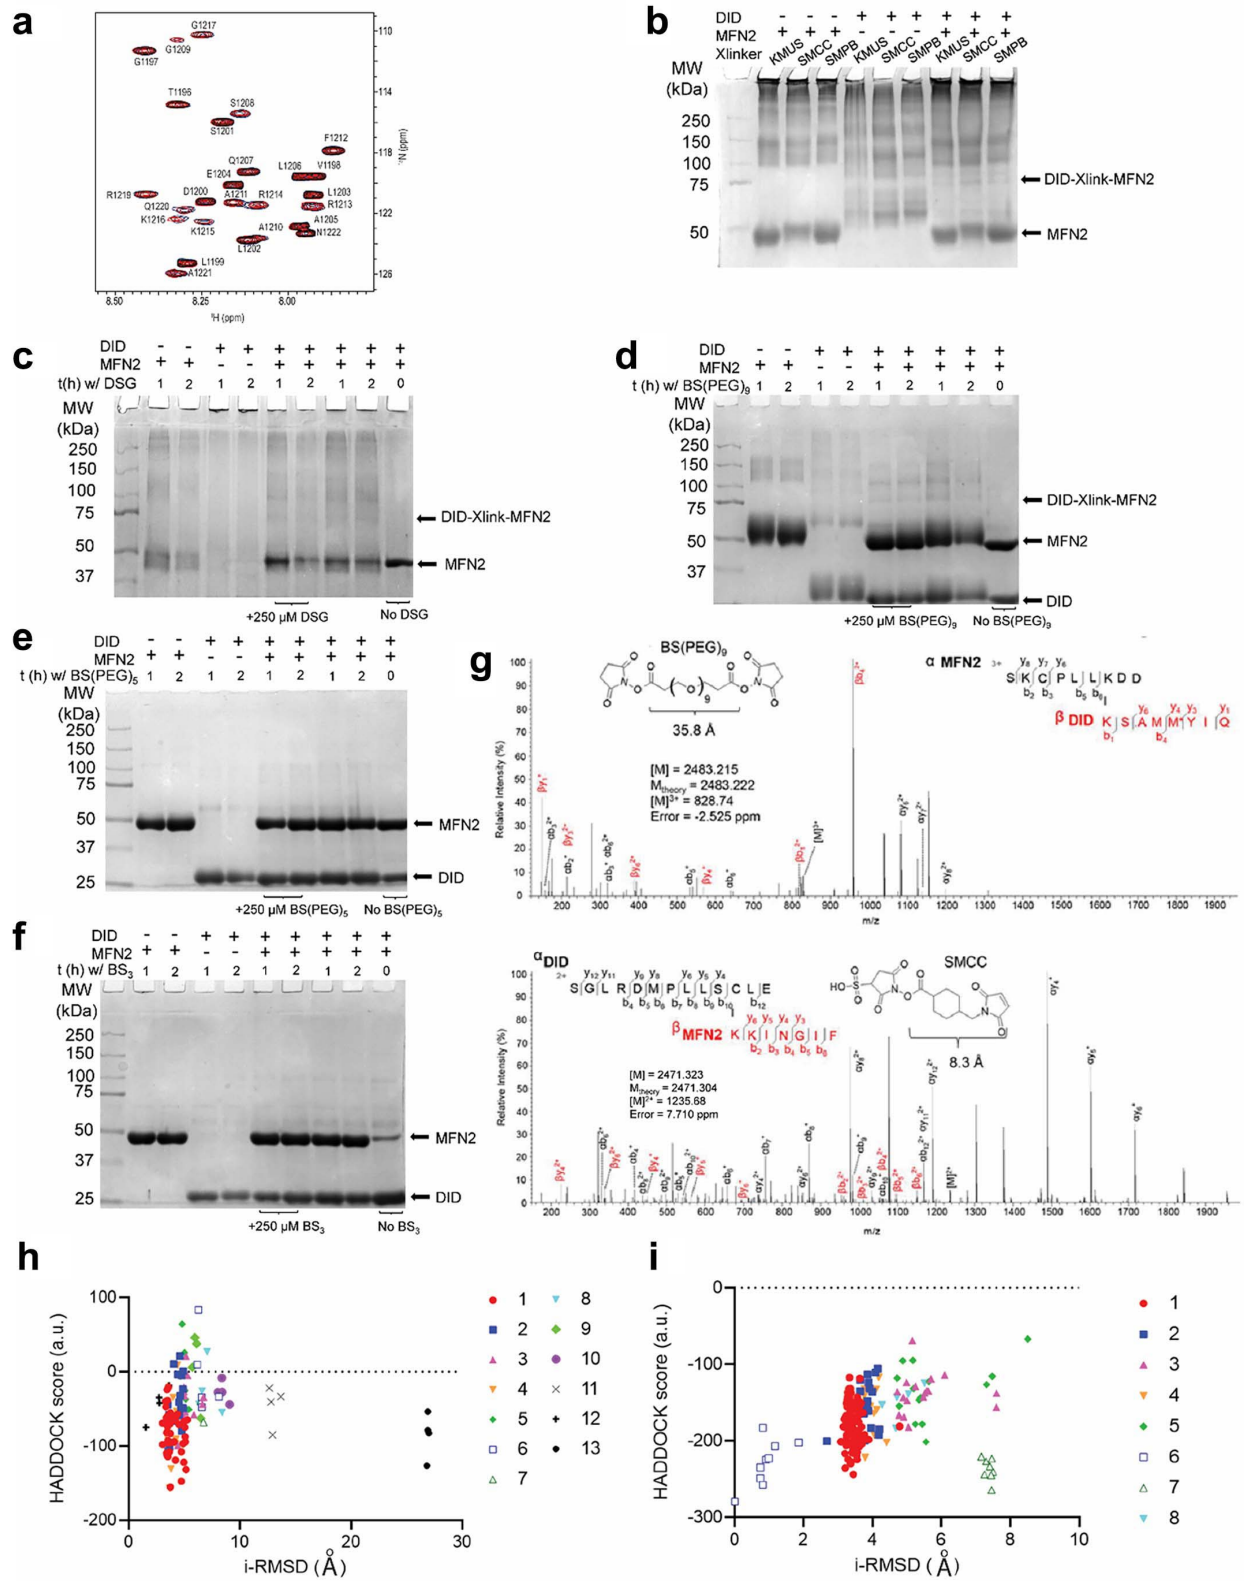

**Supplementary figure 4 | Data supporting figure 2: DID-MFN2 interactions.** **a.**  $^1\text{H}$ - $^{15}\text{N}$ -HSQC spectra of 100  $\mu\text{M}$  [ $U$ - $^{15}\text{N}$ ]-DAD<sup>M1199L</sup> upon titration with 125  $\mu\text{M}$  of MFN2 of 15N DAD<sup>M1199L</sup> showing no interaction. **b-f.** SDS-PAGE analysis of cross-linked DID and MFN2. DID and/or MFN2 (50  $\mu\text{M}$ ) were incubated with cross-linkers (500  $\mu\text{M}$  or 250  $\mu\text{M}$ ) for 1-2 h at room temperature. Aliquots of the cross-linking reaction were loaded onto an 8% SDS-polyacrylamide resolving gel. Bands corresponding to the DID monomer, MFN2 monomer, or the cross-linked DID-MFN2 1:1 complex are indicated by black arrows. **b.** Comparison between cross-linking reactions carried out with heterobifunctional (amine-to-sulfhydryl) cross-linkers KMUS, SMCC, and SMPB. Lane 9 shows a distinct band  $\sim 75$  kDa pertaining to the 1:1 DID-MFN2 complex when SMCC is used. **c-f.** Cross-linking reactions using the homobifunctional (amine-to-amine) cross-linkers, DSG **c**, BS(PEG)<sub>9</sub> **d**, BS(PEG)<sub>5</sub> **e**, and BS<sub>3</sub> **f**. In **c** and **d**, Lanes 6-9 show a faint band at  $\sim 75$  kDa corresponding to the 1:1 DID-MFN2 complex. This band is absent in control reactions carried out with DID + cross-linker and MFN2 + cross-linker. In panels (**e**) and (**f**), this band is also absent in Lanes 6-9. **g.** Representative mass spectra of DID-MFN2 peptides cross-linked using BS(PEG)<sub>9</sub> (top) and SMCC (bottom). **h-i.** Distribution of docking solutions based on HADDOCK score and the RMSD of the interfacial residues (i-RMSD). iRMSD is calculated between the average structure in the cluster and the lowest energy structure of the reference [PDB: 6JFK]. **h.** Docking results using both AIRs and UIRs and **i.** Docking results using only UIRs.

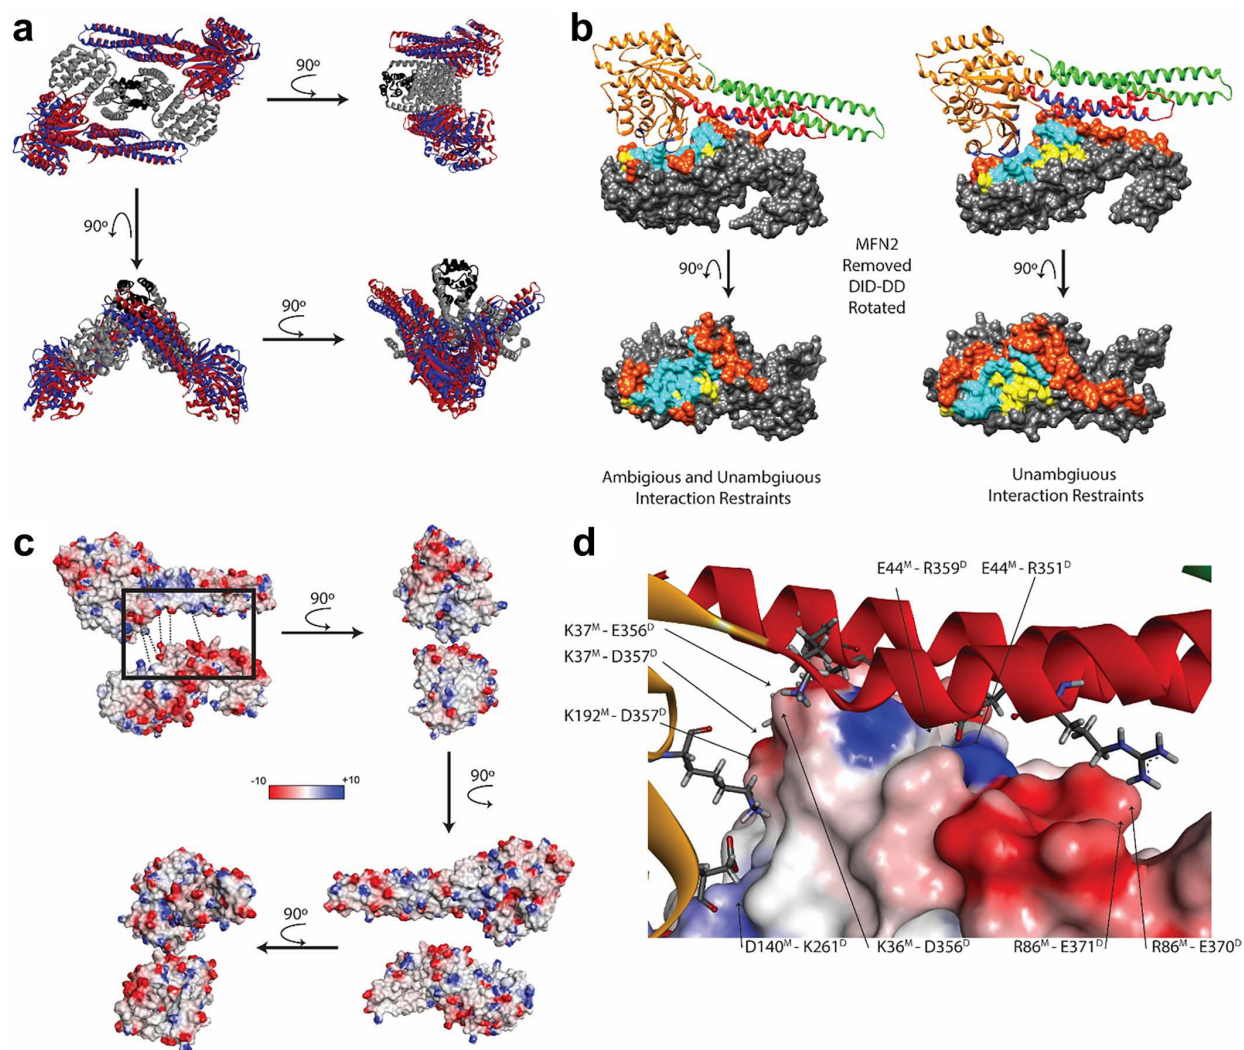

**Supplementary figure 5 | Data supporting figure 2:** Comparison and analysis of structural models of the DID-DD:MFN2 tetrameric complex using UIRs or both UIRs and AIRs. **a.** Blue and red ribbons represent MFN2 monomers using UIRs and UIRs & AIRs, respectively. Grey and black ribbons represent the DID-DD dimer. **b.** Both docking models show the binding interfaces of DID and MFN2 overlap with the binding interface of DID and DAD. Residues of MFN2 in contact with DID-DD are colored blue. The residues of DID that belong to both the binding interface between DID-DAD and DID-MFN2 are colored cyan. Those that are in the binding interface between DID-DAD exclusively are colored yellow, and those that belong to the

DID-MFN2 binding interface exclusively are colored orange. **c.** The electrostatic maps of MFN2 and DID-DD complex were shown by translating the molecules 50 Å apart from each other to highlight the surface and charge complementarity of the complex. Salt bridges are shown with small dotted lines; the solid box area is depicted in panel **d.** Salt bridges between MFN2 and DID in are labeled with arrows. Residues of MFN2 are labeled with an “M” superscript, and residues of DID-DD are labeled with a “D” superscript.

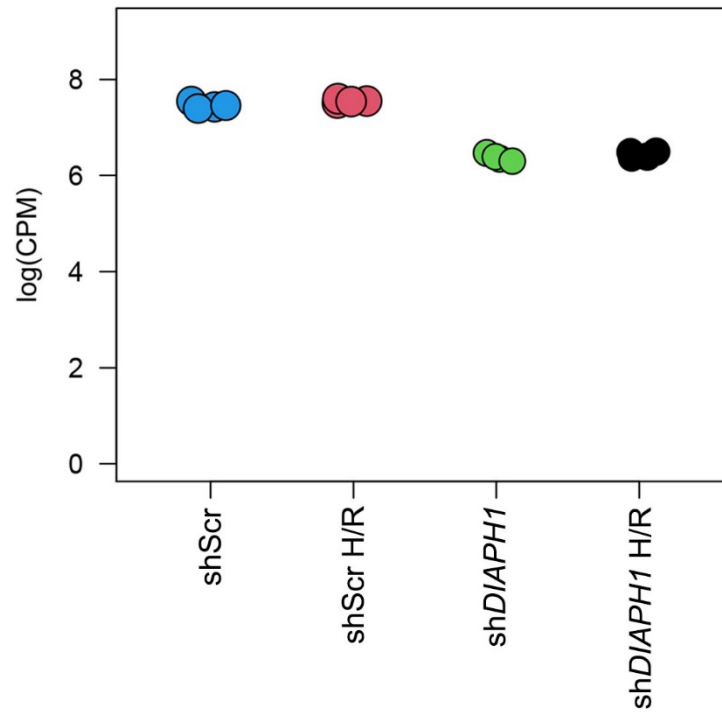

**Supplementary figure 6 | Data supporting figure 3:** Principle component analysis plot of studies in HiPSCs from bulk RNAseq data and the effects of *DIAPH1* silencing under baseline and H/R conditions. (n=4 biologically independent samples).

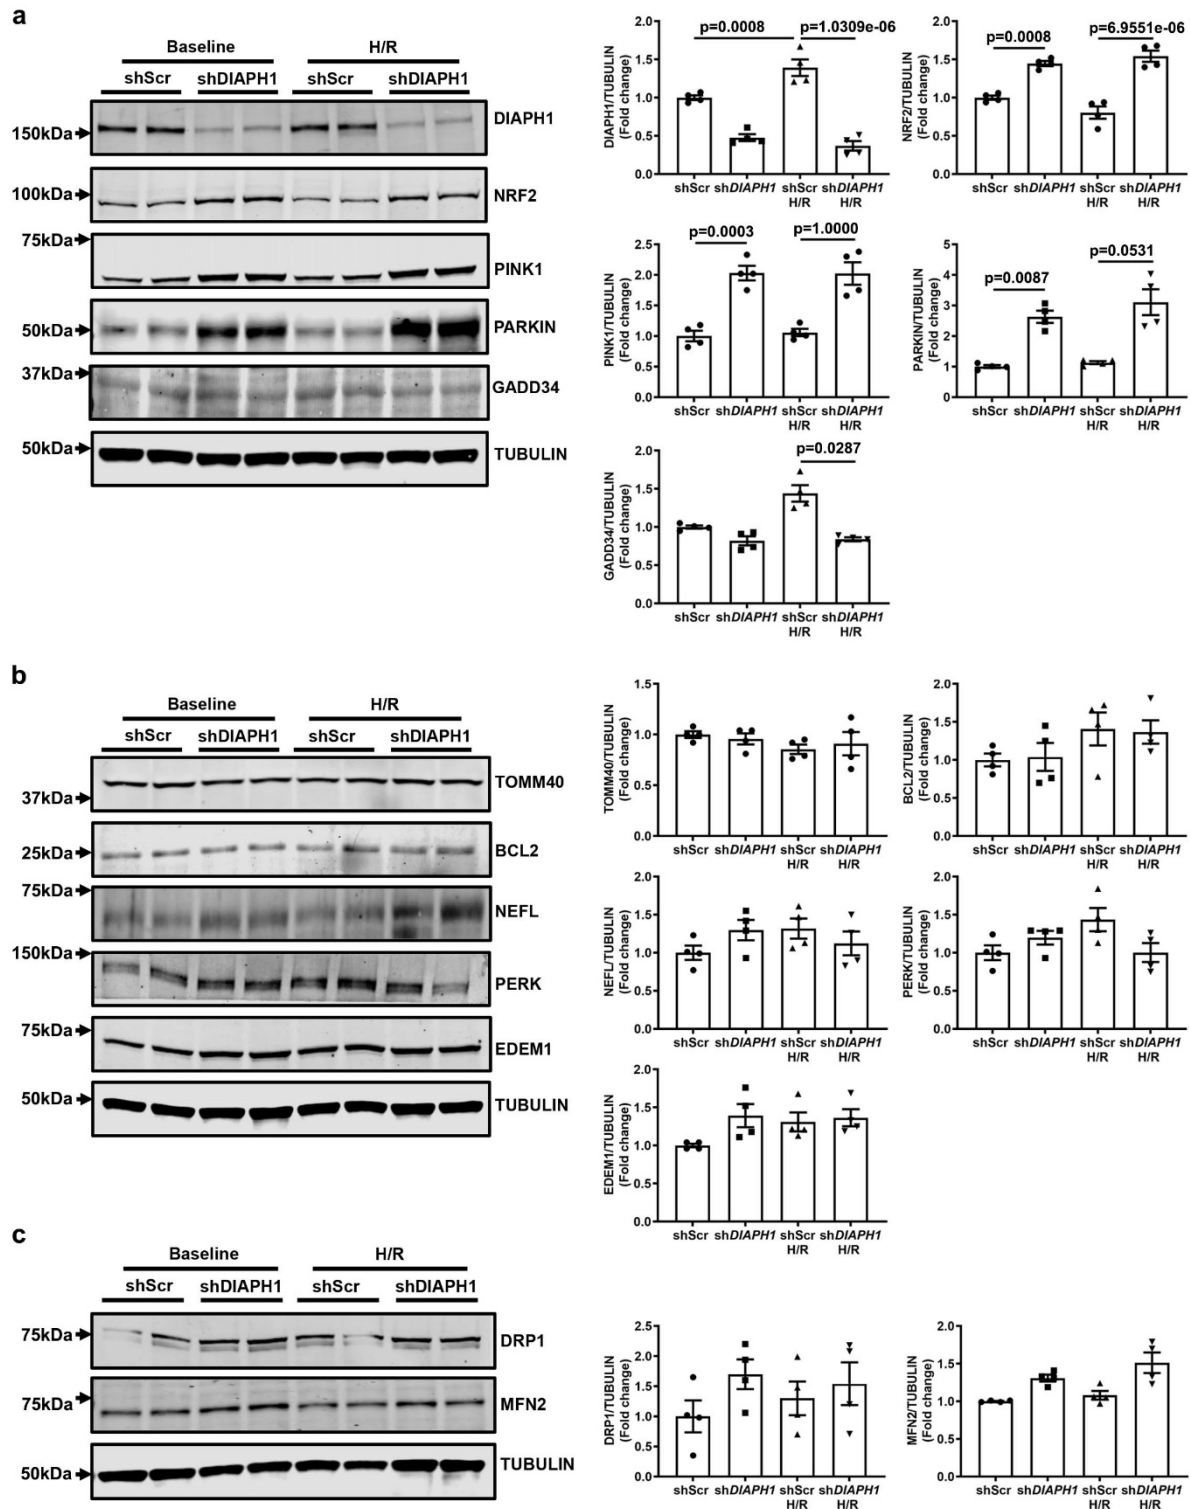

**Supplementary figure 7| Data supporting figure 3: a.** Western blot analysis was performed in shScr and shDIAPH1 HiPSC-CMs under baseline and H/R conditions. **a** represents proteins which

were significantly up- or down-regulated and **b** represents proteins which were not influenced by silencing *DIAPH1* supporting gene expression data from figure 3f. **c.** protein expression data for Mito fission/fusion markers.  $\alpha$ -Tubulin was used as loading control to normalize all blots. Quantification was performed using NIH-ImageJ software. (n=4 biologically independent samples. Welch's ANOVA with Games-Howell pairwise comparison Test for PARKIN, GADD34, Krushal-Wallis with Dunn's pairwise comparison test for PERK, EDEM1 and MFN2 and ANOVA with TukeyHSD pairwise comparison for DIAPH1, NRF2, TOMM40, BCL2, NEFL, PINK1, and DRP1 for p values). Data are presented as the mean  $\pm$  SEM. All statistics and source data are provided as a Source Data file.



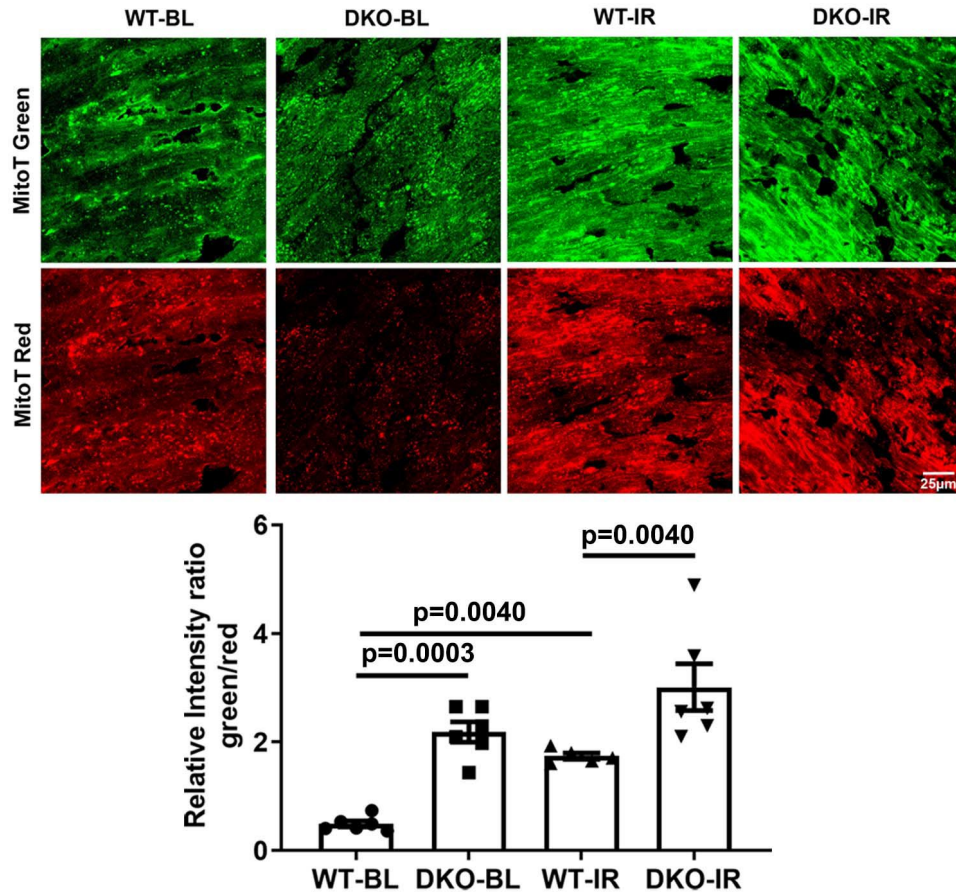

**Supplementary figure 9| Data supporting figure 4:** isolated perfused mice hearts from WT and global *Diaph1* null (DKO) mice expressing MitoTimer gene. Fluorescence imaging was performed using LEICA SP8 confocal microscope at 63X magnification. Fluorescence signal for green was detected at ex/em range. 488 nm to 530 nm. Laser intensity for 488nm filter was maintained constant at 1.8% and Argon laser power at 20%. Fluorescence signal for red was detected at ex/em. range 561 nm to 590 nm. Laser intensity for 562 nm line was maintained at 2%. Quantification represents ratio of relative intensity of green to red indicating the turnover of Mito.(n=6, n=5 (WT-IR) biologically independent samples, Welch's ANOVA with t-test with pooled SD pairwise comparison test was performed for p value). All statistics and source data are provided as a Source Data file.

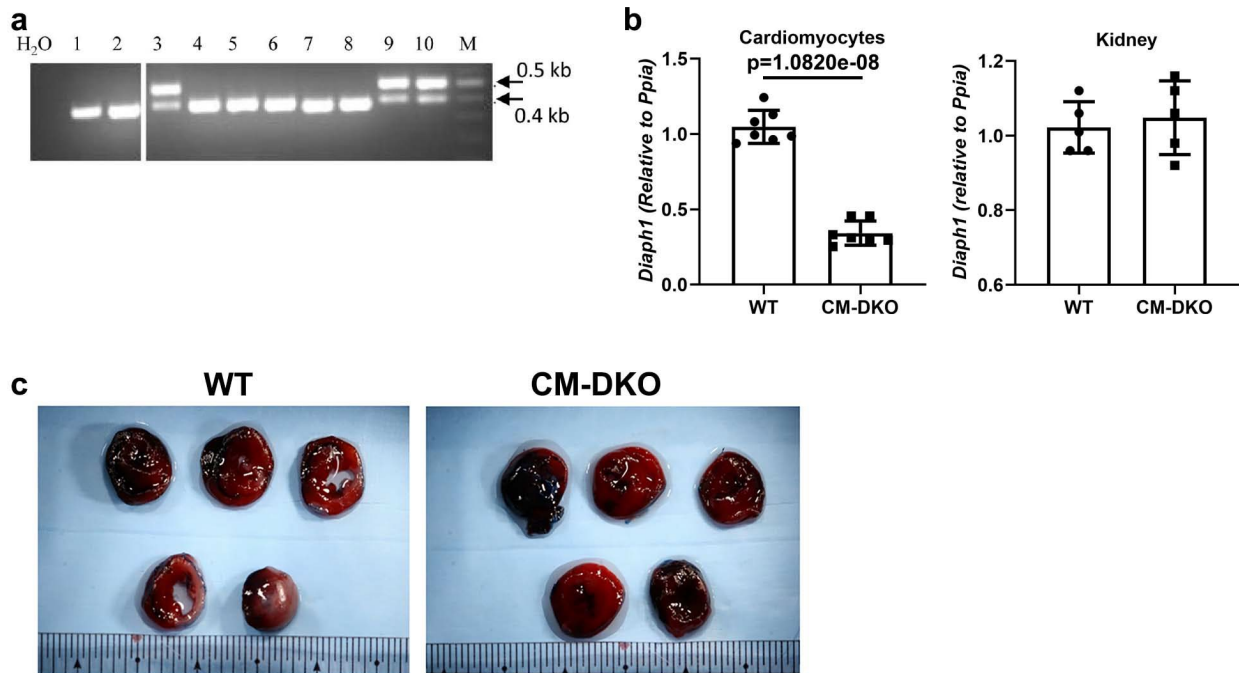

**Supplementary figure 10| Data supporting figure 5: a.** Detection of the Flp-mediated excision event by PCR. Lane 3, 9 & 10: Heterozygous *Diaph1* floxed mice. Lane 4-8: The WT non-recombined allele. Lane 1 & 2: WT genomic DNA was used as a positive control. PCR without template (H<sub>2</sub>O) served as a negative control. M: 1 kb DNA-ladder (NEB). **b.** qPCR on CMs isolated from WT and *Diaph1* floxed mice to measure *Diaph1* silencing, which was not observed in kidney. (n=7 biologically independent samples, unpaired t-test was performed for p value). **c.** represents TTC-stained sections from mice hearts for quantification displayed in figure 5b. Data are presented as the mean  $\pm$  SEM. All statistics and source data are provided as a Source Data file.

## Supplementary Tables

### Supplementary Table 1 | Data supporting figure 2. Sequence Comparison between MFN2

#### Constructs

| Full-length human MFN2*, Uniprot ID <b>O95140</b>                                                                                                                                                                                                                                                                                                                                                                                                                                                                                                                                                                                                                                                                                                                                                                                                                                             |
|-----------------------------------------------------------------------------------------------------------------------------------------------------------------------------------------------------------------------------------------------------------------------------------------------------------------------------------------------------------------------------------------------------------------------------------------------------------------------------------------------------------------------------------------------------------------------------------------------------------------------------------------------------------------------------------------------------------------------------------------------------------------------------------------------------------------------------------------------------------------------------------------------|
| MSLLFSRCNSIVTVKKNKRHM <sup>22</sup> AEVNASPLKHFVTAKKKINGIFEQLGAYIQESATFLEDT<br>YRNAELDPVTTEEQVLDVKGYLSKVRGISEVLARRHMKVAFFGRTSNGKSTVINAMLWDK<br>VLPSGIGHTTNCFLRVEGTDGHEAFLATEGSEEKRSKTVNQLAHALHQDKQLHAGSLVS<br>VMWPNSKCPLLKDDLVLMDSPGIDVTTELDSWIDKFCLDADVFLVANSESTLMQTEKHF<br>FHKVSRLSRPNIFILNNRWASASEPEYMEEVRRQHMERCTSFLVDELGVVDRSQAGDR<br>IFFVSAKEVLNARIQKAQGMPEGGALAEGFQVRMFEFQNFERRFEECISQSAVKTKFEQ<br>HTVRAKQIAEAVRLIMDSLHMAAREQQVYCEEMREERQDR <sup>400</sup> LKFIDKQLELLAQDYKLRIK<br>QITEEVERQVSTAMAEIIRLSVLVDDYQMDFHPSPVVLKVYKNELHRHIEEGLGRNMSD<br>RCSTAITNSLQTMQQDMIDGLKPLLPVSVRSQIDMLVPRQCFSLNYDLNCDKLCADFQED<br>IEFHFSLGWTMLVNRFLGPKNSRRALMGYNDQVQRPIPTPANPSMPPLPQGSALTQEEFM<br>VSMVTGLASLTSRTSMGILVVGGVVWKA VGWRLIALSFGLYGLLYVYERLTWTTKAKERA<br>FKRQFVEHASEKLQLVISYTGSNCSHQVQQELSGTFAHLCQQVDV <sup>706</sup> TRENLEQEIAAMNKK<br>IEVLDLQSKAKLLRNKAGWLDSELNMFTHQYLQPSR <sup>757</sup> |
| Truncated, modified cytosolic-MFN2*                                                                                                                                                                                                                                                                                                                                                                                                                                                                                                                                                                                                                                                                                                                                                                                                                                                           |
| MGSSHHHHHHSSGLVPRGSHM <sup>22</sup> AEVNASPLKHFVTAKKKINGIFEQLGAYIQESATFLEDT<br>YRNAELDPVTTEEQVLDVKGYLSKVRGISEVLARRHMKVAFFGRTSNGKSTVINAMLWDKV<br>LPSGIGHTTNCFLRVEGTDGHEAFLATEGSEEKRSKTVNQLAHALHQDKQLHAGSLVSVMW<br>PNSKCPLLKDDLVLMDSPGIDVTTELDSWIDKFCLDADVFLVANSESTLMQTEKHFFHKVSE<br>RLSRPNIFILNNRWASASEPEYMEEVRRQHMERCTSFLVDELGVVDRSQAGDRIFVSAKEV<br>LNARIQKAQGMPEGGALAEGFQVRMFEFQNFERRFEECISQSAVKTKFEQHTVRAKQIAEAV<br>RLIMDSLHMAAREQQVYCEEMREERQDR <sup>400</sup><br><sup>706</sup> TRENLEQEIAAMNKKIEVLDLQSKAKLLRNKAGWLDSELNMFTHQYLQPSR <sup>757</sup>                                                                                                                                                                                                                                                                                                                                        |

\* MFN2 domains HD1, GTPase, and HD2 are colored in red, orange, and green, respectively. Residues highlighted in yellow are present in the construct used by Li *et al. Nat Commun* 10, 4914 (2019). <https://doi.org/10.1038/s41467-019-12912-0>, [PDB entry 6JFK].

**Supplementary Table 2 | Data supporting figure 2. Intermolecular cross-links between DID and MFN2**

|                                    |                                                                                                                  |                                                                                              |                                                                                      |                                                                                           |                                                                                 |
|------------------------------------|------------------------------------------------------------------------------------------------------------------|----------------------------------------------------------------------------------------------|--------------------------------------------------------------------------------------|-------------------------------------------------------------------------------------------|---------------------------------------------------------------------------------|
| Cross-linker reagent               | DSG                                                                                                              | SMCC                                                                                         |                                                                                      |                                                                                           |                                                                                 |
| Spacer length                      | 7.7 Å                                                                                                            | 8.3 Å                                                                                        |                                                                                      |                                                                                           |                                                                                 |
| Specificity                        | Homobifunctional<br>Reactive toward primary amines                                                               | Heterobifunctional<br>Forms a thio-ether bond between a primary amine and a sulfhydryl group |                                                                                      |                                                                                           |                                                                                 |
| Sequences of cross-linked peptides | <sup>369</sup> GEEDSYDLKG <sup>378</sup><br>- <sup>74</sup> QVLDVKG <sup>81</sup>                                | <sup>221</sup> LKAFMNNKF <sup>229</sup><br>- <sup>131</sup> NCFLRVE <sup>137</sup>           | <sup>154</sup> SGLRDMPLLSCLE <sup>166</sup><br>- <sup>37</sup> KKINGIF <sup>43</sup> | <sup>158</sup> KTVNQLAHALH <sup>168</sup><br>- <sup>158</sup> DMPLLSCL <sup>165</sup>     |                                                                                 |
| Cross-linked residues              | DID K377 – MFN2 K79                                                                                              | DID K228 – MFN2 C132                                                                         | DID C164 – MFN2 K37                                                                  | MFN2 K158-DID C164                                                                        |                                                                                 |
| M <sub>theoretical</sub>           | 2128.992 Da                                                                                                      | 2211.109 Da                                                                                  | 2471.304 Da                                                                          | 2341.204 Da                                                                               |                                                                                 |
| [M] <sub>experimental</sub>        | 2128.976 Da                                                                                                      | 2211.107 Da                                                                                  | 2471.323 Da                                                                          | 2341.195 Da                                                                               |                                                                                 |
| Error                              | -7.3 ppm                                                                                                         | -0.86 ppm                                                                                    | 7.7 ppm                                                                              | -4.0 ppm                                                                                  |                                                                                 |
| Cross-linker reagent               | BS(PEG) <sub>9</sub>                                                                                             |                                                                                              |                                                                                      |                                                                                           |                                                                                 |
| Spacer length                      | 35.8 Å                                                                                                           |                                                                                              |                                                                                      |                                                                                           |                                                                                 |
| Specificity                        | Homobifunctional<br>Reactive toward primary amines                                                               |                                                                                              |                                                                                      |                                                                                           |                                                                                 |
| Sequences of cross-linked peptides | <sup>186</sup> SKCPLLKDD <sup>194</sup><br>- <sup>143</sup> KSAMM*YIQ <sup>150</sup><br>M* - oxidized Methionine | <sup>103</sup> GRTSNGKSTV <sup>112</sup><br>- <sup>311</sup> KVGCLQL <sup>317</sup>          | <sup>305</sup> SAKEVLNA <sup>312</sup><br>- <sup>225</sup> MNNKFGIK <sup>232</sup>   | <sup>350</sup> SQSAVKT <sup>356</sup><br>- <sup>300</sup> DGLKSGTTIAL<br>K <sup>311</sup> | <sup>727</sup> LQSKAK <sup>732</sup><br>- <sup>307</sup> TIALKVG <sup>314</sup> |
| Cross-linked residues              | MFN2 K192 – DID K143                                                                                             | MFN2 K109 – DID K311                                                                         | MFN2 K307 – DID K228                                                                 | MFN2 K355 – DID K303                                                                      | MFN2 730 – DID K311                                                             |
| M <sub>theoretical</sub>           | 2483.222 Da                                                                                                      | 2244.200                                                                                     | 2260.240                                                                             | 2401.317                                                                                  | 1956.118                                                                        |
| [M] <sub>experimental</sub>        | 2483.215 Da                                                                                                      | 2244.177                                                                                     | 2260.200                                                                             | 2401.358                                                                                  | 1956.085                                                                        |
| Error                              | -2.5 ppm                                                                                                         | -10 ppm                                                                                      | 16 ppm                                                                               | 17 ppm                                                                                    | -17 ppm                                                                         |

**Supplementary Table 3** | Data supporting figure 2. Active residues on MFN2 and DID-DD used to define ambiguous interaction restraints

| Active Residues on each MFN2 monomer (positive cross-links with DID) | Active Residues on each DID monomer (within 5 Å of DAD in the model of a DID-DAD complex)                   |
|----------------------------------------------------------------------|-------------------------------------------------------------------------------------------------------------|
| 37, 79, 109, 132, 158, 192, 307, 355, 730                            | 177, 178, 222, 225, 226, 227, 231, 261, 262, 264, 265, 266, 268, 29, 316, 319, 320, 323, 357, 360, 361, 366 |

**Supplementary Table 4 | Data supporting figure 2.** Distance violations in the representative model of the docked A<sub>2</sub>B<sub>2</sub> DID-DD-MFN2 complex

| Atom pairs                                                                                    | Expected distances | Observed distances | Violations at or below 5 Å | Violations above 5 Å |
|-----------------------------------------------------------------------------------------------|--------------------|--------------------|----------------------------|----------------------|
| N <sup>ε</sup> of Lys 143 (DID-DD, seg ID B) and N <sup>ε</sup> of Lys 192 (MFN2, seg ID A)   | 35.8 Å             | 38.7 Å             | 2.9 Å                      | -                    |
| N <sup>ε</sup> of Lys 1143 (DID-DD, seg ID B) and N <sup>ε</sup> of Lys 2192 (MFN2, seg ID C) | 35.8 Å             | 36.4 Å             | 0.6 Å                      | -                    |
| N <sup>ε</sup> of Lys 109 (MFN2, seg ID A) and N <sup>ε</sup> of Lys 311 (DID-DD, seg ID B)   | 35.8 Å             | 40.9 Å             | -                          | 5.1 Å                |
| N <sup>ε</sup> of Lys 2109 (MFN2, seg ID C) and N <sup>ε</sup> of Lys 1311 (DID-DD, seg ID B) | 35.8 Å             | 40.9 Å             | -                          | 5.1 Å                |
| N <sup>ε</sup> of Lys 307 (MFN2, seg ID A) and N <sup>ε</sup> of Lys 228 (DID-DD, seg ID B)   | 35.8 Å             | 30.7 Å             | -                          | -5.1 Å               |
| N <sup>ε</sup> of Lys 2307 (MFN2, seg ID C) and N <sup>ε</sup> of Lys 1228 (DID-DD, seg ID B) | 35.8 Å             | 30.9 Å             | -4.9 Å                     | -                    |
| N <sup>ε</sup> of Lys 355 (MFN2, seg ID A) and N <sup>ε</sup> of Lys 303 (DID-DD, seg ID B)   | 35.8 Å             | 40.8 Å             | 5.0 Å                      | -                    |
| N <sup>ε</sup> of Lys 2355 (MFN2, seg ID C) and N <sup>ε</sup> of Lys 1303 (DID-DD, seg ID B) | 35.8 Å             | 40.7 Å             | 4.9 Å                      | -                    |
| N <sup>ε</sup> of Lys 730 (MFN2, seg ID A) and N <sup>ε</sup> of Lys 311 (DID-DD, seg ID B)   | 35.8 Å             | 30.9 Å             | -4.9 Å                     | -                    |
| N <sup>ε</sup> of Lys 2730 (MFN2, seg ID C) and N <sup>ε</sup> of Lys 1311 (DID-DD, seg ID B) | 35.8 Å             | 30.8 Å             | -5.0 Å                     | -                    |
| N <sup>ε</sup> of Lys 79 (MFN2, seg ID A) and N <sup>ε</sup> of Lys 377 (DID-DD, seg ID B)    | 7.7 Å              | 9.1 Å              | 1.4 Å                      | -                    |
| N <sup>ε</sup> of Lys 2079 (MFN2, seg ID C) and N <sup>ε</sup> of Lys 1377 (DID-DD, seg ID B) | 7.7 Å              | 8.4 Å              | 0.7 Å                      | -                    |
| N <sup>ε</sup> of Lys 158 (MFN2, seg ID A) and S <sup>γ</sup> of Cys 164 (DID-DD, seg ID B)   | 8.3 Å              | 17.7 Å             | -                          | 9.4 Å                |
| N <sup>ε</sup> of Lys 2158 (MFN2, seg ID C) and S <sup>γ</sup> of Cys 1164 (DID-DD, seg ID B) | 8.3 Å              | 19.1 Å             | -                          | 10.8 Å               |
| N <sup>ε</sup> of Lys 37 (MFN2, seg ID A) and S <sup>γ</sup> of Cys 164 (DID-DD, seg ID B)    | 8.3 Å              | 37.4 Å             | -                          | 29.1 Å               |
| N <sup>ε</sup> of Lys 2037 (MFN2, seg ID C) and S <sup>γ</sup> of Cys 1164 (DID-DD, seg ID B) | 8.3 Å              | 35.6 Å             | -                          | 27.3 Å               |
| S <sup>γ</sup> of Cys 132 (MFN2, seg ID A) and N <sup>ε</sup> of Lys 228 (DID-DD, seg ID B)   | 8.3 Å              | 15.8 Å             | -                          | 7.5 Å                |
| S <sup>γ</sup> of Cys 2132 (MFN2, seg ID C) and N <sup>ε</sup> of Lys 1228 (DID-DD, seg ID B) | 8.3 Å              | 17.2 Å             | -                          | 8.9 Å                |

**Supplementary Table 5** | Data supporting figure 2. Hydrogen bonds and salt bridges in the representative model of the docked A<sub>2</sub>B<sub>2</sub> DID-DD-MFN2 complex

| Hydrogen bonds                                     | Salt bridges                                     |
|----------------------------------------------------|--------------------------------------------------|
| HZ2 of Lys 36 (MFN2) and OE1 of Glu 356 (DID-DD)   | NZ of Lys 36 (MFN2) and OE1 of Glu 356 (DID-DD)  |
| HZ2 of Lys 37 (MFN2) and OD1 of Asn 355 (DID-DD)   | NZ of Lys 37 (MFN2) and OD1 of Asp 357 (DID-DD)  |
| O of Lys 37 (MFN2) and HH12 of Arg 359 (DID-DD)    | NZ of Lys 38 (MFN2) and OE1 of Glu 354 (DID-DD)  |
| O of Lys 37 (MFN2) and HH22 of Arg 359 (DID-DD)    | NZ of Lys 38 (MFN2) and OD2 of Asp 357 (DID-DD)  |
| HZ2 of Lys 38 (MFN2) and OD2 of Asp 357 (DID-DD)   | OE1 of Glu 44 (MFN2) and NE of Arg 351 (DID-DD)  |
| HZ3 of Lys 38 (MFN2) and OD2 of Asp 357 (DID-DD)   | OE1 of Glu 44 (MFN2) and NH1 of Arg 351 (DID-DD) |
| HZ2 of Lys 38 (MFN2) and OE1 of Glu 354 (DID-DD)   | OE2 of Glu 44 (MFN2) and NH1 of Arg 359 (DID-DD) |
| OE1 of Glu 44 (MFN2) and HH11 of Arg 351 (DID-DD)  | NH1 of Arg 86 (MFN2) and OE2 of Glu 370 (DID-DD) |
| HH11 of Arg 86 (MFN2) and OE2 of Glu 370 (DID-DD)  | NH2 of Arg 86 (MFN2) and OE2 of Glu 371 (DID-DD) |
| OE1 of Glu 90 (MFN2) and HD22 of Asn 363 (DID-DD)  | OD1 of Asp 140 (MFN2) and NZ of Lys 261 (DID-DD) |
| O of Asp 140 (MFN2) and HZ2 of Lys 261 (DID-DD)    | NZ of Lys 192 (MFN2) and OD1 of Asp 357 (DID-DD) |
| O of Asp 140 (MFN2) and HZ3 of Lys 261 (DID-DD)    |                                                  |
| OD1 of Asp 140 (MFN2) and HZ3 of Lys 261 (DID-DD)  |                                                  |
| OD1 of Asp 140 (MFN2) and HZ2 of Lys 261 (DID-DD)  |                                                  |
| OD1 of Asp 140 (MFN2) and HE21 of Gln 316 (DID-DD) |                                                  |
| O of Gly 141 (MFN2) and HZ3 of Lys 261 (DID-DD)    |                                                  |
| ND1 of His 142 (MFN2) and O of Lys 261 (DID-DD)    |                                                  |
| HE2 of His 142 (MFN2) and O of Met 135 (DID-DD)    |                                                  |
| HZ2 of Lys 158 (MFN2) and O of Leu 172 (DID-DD)    |                                                  |
| HZ1 of Lys 158 (MFN2) and OD1 of Ala 123 (DID-DD)  |                                                  |
| HZ1 of Lys 158 (MFN2) and OD1 of Asn 226 (DID-DD)  |                                                  |
| HZ3 of Lys 158 (MFN2) and OD1 of Asn 226 (DID-DD)  |                                                  |

**Supplementary Table 6 | Data supporting figure 2. HADDOCK Parameters**

| Parameter                                 | Value                                                                                                                                                                                                                                                                                                                                                                                                                                                                                                                                                                                                                                                                                                                                                                                                                                                                                                                                                                                                                                                                                                                                                                                                          |
|-------------------------------------------|----------------------------------------------------------------------------------------------------------------------------------------------------------------------------------------------------------------------------------------------------------------------------------------------------------------------------------------------------------------------------------------------------------------------------------------------------------------------------------------------------------------------------------------------------------------------------------------------------------------------------------------------------------------------------------------------------------------------------------------------------------------------------------------------------------------------------------------------------------------------------------------------------------------------------------------------------------------------------------------------------------------------------------------------------------------------------------------------------------------------------------------------------------------------------------------------------------------|
| Structure definition                      | Molecule 1, Segment ID A: first MFN2 monomer (residue numbers 24-756)*<br>Molecule 2, Segment ID B: DID-DD dimer (residue numbers 142-444 on the first monomer and 1142-1444 on the second monomer)*<br>Molecule 3, Segment ID C: second MFN2 monomer (residue numbers 2024-2756)*<br>*Numbering on the second monomer corresponds to the value from the first monomer incremented by 1000 (for DID) or 2000 (for MFN2) to distinguish between monomers during docking                                                                                                                                                                                                                                                                                                                                                                                                                                                                                                                                                                                                                                                                                                                                         |
| Histidine protonation states              | Automatically defined (default)                                                                                                                                                                                                                                                                                                                                                                                                                                                                                                                                                                                                                                                                                                                                                                                                                                                                                                                                                                                                                                                                                                                                                                                |
| Semi-flexible and fully-flexible segments | Automatically defined (default)                                                                                                                                                                                                                                                                                                                                                                                                                                                                                                                                                                                                                                                                                                                                                                                                                                                                                                                                                                                                                                                                                                                                                                                |
| Molecular interaction matrix              | Between Molecule 1 and Molecule 1: 1.0<br>Between Molecule 1 and Molecule 2: 1.0<br>Between Molecule 1 and Molecule 3: 1.0<br>Between Molecule 2 and Molecule 1: 1.0<br>Between Molecule 2 and Molecule 2: 1.0<br>Between Molecule 2 and Molecule 3: 1.0<br>Between Molecule 3 and Molecule 1: 1.0<br>Between Molecule 3 and Molecule 2: 1.0<br>Between Molecule 3 and Molecule 3: 1.0                                                                                                                                                                                                                                                                                                                                                                                                                                                                                                                                                                                                                                                                                                                                                                                                                         |
| Distance restraints                       | Unambiguous restraints:<br>assign (resid 192 and segid A and name NZ) ( resid 143 and segid B and name NZ) 35.8 5.0 5.0<br>assign ( resid 109 and segid A and name NZ) (resid 311 and segid B and name NZ) 35.8 5.0 5.0<br>assign (resid 307 and segid A and name NZ) (resid 228 and segid B and name NZ) 35.8 5.0 5.0<br>assign (resid 355 and segid A and name NZ) (resid 303 and segid B and name NZ) 35.8 5.0 5.0<br>assign (resid 730 and segid A and name NZ) (resid 311 and segid B and name NZ) 35.8 5.0 5.0<br>assign (resid 79 and segid A and name NZ) (resid 377 and segid B and name NZ) 7.7 5.0 5.0<br>assign (resid 158 and segid A and name NZ) (resid 164 and segid B and name SG) 8.3 5.0 5.0<br>assign (resid 37 and segid A and name NZ) (resid 164 and segid B and name SG) 8.3 5.0 5.0<br>assign (resid 132 and segid A and name SG) (resid 228 and segid B and name NZ) 8.3 5.0 5.0<br>assign (resid 2192 and segid C and name NZ) ( resid 1143 and segid B and name NZ) 35.8 5.0 5.0<br>assign (resid 2109 and segid C and name NZ) (resid 1311 and segid B and name NZ) 35.8 5.0 5.0<br>assign (resid 2307 and segid C and name NZ) (resid 1228 and segid B and name NZ) 35.8 5.0 5.0 |

|                                                                                                                                                                      |                                                                                                                                                                                                                                                                                                                                                                                                                                                                                                                                                                                                                                                                                                                                                                                               |
|----------------------------------------------------------------------------------------------------------------------------------------------------------------------|-----------------------------------------------------------------------------------------------------------------------------------------------------------------------------------------------------------------------------------------------------------------------------------------------------------------------------------------------------------------------------------------------------------------------------------------------------------------------------------------------------------------------------------------------------------------------------------------------------------------------------------------------------------------------------------------------------------------------------------------------------------------------------------------------|
|                                                                                                                                                                      | <p>assign (resid 2355 and segid C and name NZ) (resid 1303 and segid B and name NZ) 35.8 5.0 5.0</p> <p>assign (resid 2730 and segid C and name NZ) (resid 1311 and segid B and name NZ) 35.8 5.0 5.0</p> <p>assign (resid 2079 and segid C and name NZ) (resid 1377 and segid B and name NZ) 7.7 5.0 5.0</p> <p>assign (resid 2158 and segid C and name NZ) (resid 1164 and segid B and name SG) 8.3 5.0 5.0</p> <p>assign (resid 2037 and segid C and name NZ) (resid 1164 and segid B and name SG) 8.3 5.0 5.0</p> <p>assign (resid 2132 and segid C and name SG) (resid 1228 and segid B and name NZ) 8.3 5.0 5.0</p> <p>Non-polar hydrogens removed during docking (default)</p> <p>Random exclusion of a fraction of AIRs enabled, with 2 partitions for random exclusion (default)</p> |
| Sampling parameters (default)                                                                                                                                        | <p>Number of structures for rigid docking: 1000</p> <p>Number of trials for rigid body minimization: 5</p> <p>Sample 180 degrees rotated solutions during rigid body EM: Enabled</p> <p>Number of structures for semi-flexible refinement: 200</p> <p>Solvent used for last iteration: water</p> <p>Number of structures for explicit solvent refinement: 200</p> <p>Electrostatic energy term, Epsilon: 10.0</p>                                                                                                                                                                                                                                                                                                                                                                             |
| Parameters for clustering (default)                                                                                                                                  | <p>Clustering method – Fraction of Common Contacts (FCC)</p> <p>RMSD Cutoff for clustering: 0.6 Angstrom</p> <p>Minimum cluster size: 4</p>                                                                                                                                                                                                                                                                                                                                                                                                                                                                                                                                                                                                                                                   |
| Dihedral and hydrogen bond restraints, residual dipolar couplings, pseudo contact shift restraints, relaxation anisotropy restraints                                 | None                                                                                                                                                                                                                                                                                                                                                                                                                                                                                                                                                                                                                                                                                                                                                                                          |
| Noncrystallographic symmetry restraints                                                                                                                              | None                                                                                                                                                                                                                                                                                                                                                                                                                                                                                                                                                                                                                                                                                                                                                                                          |
| Symmetry Restraints                                                                                                                                                  | <p>Enabled, with force constant of 10.0</p> <p>C2 Symmetry Pairs:</p> <p>First C2 pair: Seg ID B residues 142-444 and seg ID B residues 1142-1444</p> <p>Second C2 pair: Seg ID A residues 24-756 and seg ID C residues 2024-2756</p>                                                                                                                                                                                                                                                                                                                                                                                                                                                                                                                                                         |
| Energy constants for unambiguous restraints and ambiguous restraints (default)<br>Iterations<br>it0: Rigid body EM<br>it1: Semi-flexible SA<br>it2: Water refinement | <p>First iteration: 0</p> <p>Last iteration: 2</p> <p>Energy constants per stage</p> <p>Hot: 10.0</p> <p>Cool1: 10.0</p> <p>Cool2: 50.0</p> <p>Cool3: 50.0</p>                                                                                                                                                                                                                                                                                                                                                                                                                                                                                                                                                                                                                                |

|                                             |                                                                                                                                                                                                                                                                                                                                                                                                                                                                                                                                                      |
|---------------------------------------------|------------------------------------------------------------------------------------------------------------------------------------------------------------------------------------------------------------------------------------------------------------------------------------------------------------------------------------------------------------------------------------------------------------------------------------------------------------------------------------------------------------------------------------------------------|
| Energy and interaction parameters (default) | <p>Nonbonded parameters: OPLSX, dihedral angle restraints included</p> <p>Electrostatic energy terms included during rigid body docking and semi-flexible SA</p> <p>Constant dielectric (cdie) electrostatic energy term</p> <p>Scaling of intermolecular interactions for rigid body EM: 1.0</p> <p>Scaling of intermolecular interactions for semi-flexible SA (it1): initial values of 0.001 for both rigid body dynamic stage and cool2, 0.05 for cool3; final values of 0.001 for rigid body dynamic stage and 1.0 for both cool2 and cool3</p> |
| Scoring parameters                          | <p>Default values for it0, it1, and water refinement</p> <p>Evdw: 0.01, 1.0, 1.0</p> <p>Eelec: 1.0, 1.0, 0.2</p> <p>Eair: 0.01, 0.1, 0.1</p> <p>Esym: 0.1,0.1,0.1</p> <p>Edesolv: 1.0,1.0,1.0</p> <p>dEint: 0.0, 0.0, 0.0</p>                                                                                                                                                                                                                                                                                                                        |

**Supplementary Table 7** | Data supporting figure 2. Statistics for the most reliable clusters of docking solutions obtained using different docking protocols

| Type of interaction restraints                                          | AIRs (DID residues bound to DAD were defined as active residues)<br>Unambiguous interaction restraints (from positive cross-links between DID and MFN2) | Unambiguous interaction restraints (from positive cross-links between DID and MFN2) |
|-------------------------------------------------------------------------|---------------------------------------------------------------------------------------------------------------------------------------------------------|-------------------------------------------------------------------------------------|
| Most reliable cluster                                                   | Cluster 1                                                                                                                                               | Cluster 6                                                                           |
| HADDOCK score (a.u.)                                                    | -139.0 ± 13.1                                                                                                                                           | -255.0 ± 16.1                                                                       |
| Cluster size                                                            | 47                                                                                                                                                      | 9                                                                                   |
| RMSD from the overall lowest-energy structure (kcal·mol <sup>-1</sup> ) | 6.0 ± 0.6                                                                                                                                               | 0.6 ± 0.3                                                                           |
| Van der Waals energy (kcal·mol <sup>-1</sup> )                          | -122.6 ± 9.6                                                                                                                                            | -154.5 ± 12.9                                                                       |
| Electrostatic energy (kcal·mol <sup>-1</sup> )                          | -1508.8 ± 109.8                                                                                                                                         | -1009.1 ± 30.3                                                                      |
| Desolvation energy (kcal·mol <sup>-1</sup> )                            | 23.1 ± 17.6                                                                                                                                             | 56.4 ± 13.3                                                                         |
| Restraints violation energy (kcal·mol <sup>-1</sup> )                   | 1707.3 ± 164.01                                                                                                                                         | 433.4 ± 31.21                                                                       |
| Buried Surface Area (Å <sup>2</sup> )                                   | 5453.2 ± 340.4                                                                                                                                          | 5429.8 ± 147.1                                                                      |
| Z-Score                                                                 | -1.9                                                                                                                                                    | -1.4                                                                                |

**Supplementary Table 8: Clone IDs (Materials and Methods)**

| Clone ID        | Knockdown Gene | Target Sequence       |
|-----------------|----------------|-----------------------|
| TRCN0000118678  | <i>DIAPH1</i>  | GCCCAGAATCTCTCAATCTTT |
| TRCN00000626660 | <i>AGER</i>    | GCGGCTGGAATGGAAACTGAA |
| SHC002V         | Controls       | Non-Mammalian         |

**Supplementary Table 9: Primers used in the studies (Materials and Methods)**

| <b>Taqman Catalog #</b> | <b>Human Gene</b> |
|-------------------------|-------------------|
| Hs00946556_m1           | <i>DIAPH1</i>     |
| Hs00762436_s1           | <i>TOMM40</i>     |
| Hs00975961_g1           | <i>NRF2</i>       |
| Hs01048932_g1           | <i>BCL2</i>       |
| Hs00196245_m1           | <i>NEFL</i>       |
| Hs01038322_m1           | <i>PARKIN</i>     |
| Hs00984003_m1           | <i>PERK</i>       |
| Hs00169585_m1           | <i>GADD34</i>     |
| Hs00976004_m1           | <i>EDEM1</i>      |
| Hs04194521_s1           | <i>PPIA</i>       |
| <b>Taqman Catalog #</b> | <b>Rat Gene</b>   |
| Rn01406955_m1           | <i>Diaph1</i>     |
| Rn00690933_m1           | <i>Ppia</i>       |
| <b>Taqman Catalog #</b> | <b>Mouse Gene</b> |
| Mm00438700_m1           | <i>Diaph1</i>     |
| Mm02342430_g1           | <i>Ppia</i>       |

**Supplementary Table 10: Primary antibodies used for DUOLINK PLA and Western blotting studies**

| <b>Antibodies for PLA</b> | <b>Host</b> | <b>Company</b>    | <b>Cat #</b> | <b>Dilution</b> |
|---------------------------|-------------|-------------------|--------------|-----------------|
| DIAPH1                    | Rabbit      | ABCAM             | ab129167     | 1:200           |
| DIAPH2                    | Rabbit      | ABCAM             | ab181165     | 1:200           |
| MFN2                      | Mouse       | ABCAM             | ab56889      | 1:150           |
| MFN1                      | Mouse       | SIGMA             | WH0055669M4  | 1:200           |
| VDAC1                     | Mouse       | ABCAM             | ab186321     | 1:200           |
| GRP75                     | Mouse       | ABCAM             | ab2799       | 1:200           |
| IP3R                      | Mouse       | ABCAM             | ab252536     | 1:200           |
| IP3R1                     | Rabbit      | Cell Signaling    | 8568         | 1:200           |
| RHOA                      | Mouse       | ABCAM             | ab54835      | 1:200           |
| <b>Antibodies for WB</b>  | <b>Host</b> | <b>Company</b>    | <b>Cat #</b> |                 |
| DIAPH1                    | Rabbit      | ABCAM             | ab129167     | 1:1000          |
| MFN2                      | Mouse       | ABCAM             | ab56889      | 1:1000          |
| NRF2                      | Rabbit      | ABCAM             | ab137550     | 1:1000          |
| PINK1                     | Rabbit      | Cell Signaling    | 6946S        | 1:1000          |
| PARKIN                    | Mouse       | Cell Signaling    | 4211S        | 1:1000          |
| GADD34                    | Mouse       | ABCAM             | ab236516     | 1:1000          |
| $\alpha$ -TUBULIN         | Mouse       | SIGMA             | T5168        | 1:25000         |
| TOMM40                    | Rabbit      | ABCAM             | ab185543     | 1:1000          |
| BCL2                      | Rabbit      | ABCAM             | ab32124      | 1:1000          |
| NEFL                      | Rabbit      | Novus Biologicals | NB300-131    | 1:1000          |
| PERK                      | Mouse       | Cell Signaling    | 3192S        | 1:1000          |
| EDEM1                     | Rabbit      | ABCAM             | ab200645     | 1:1000          |
| DRP1                      | Rabbit      | ABCAM             | ab184247     | 1:1000          |
